# Supplementary material for: Whole-genome epidemiology, characterisation, and phylogenetic reconstruction of Staphylococcus aureus strains in a paediatric hospital
Source: Genome Med. 2018 Nov 13;10:82. doi: 10.1186/s13073-018-0593-7 (PMC6234625; doi:10.1186/s13073-018-0593-7)
Supplement: Supplementary file 5 — Table S4. Most relevant clones represented in the cohort and their abundance. (XLSX 9 kb) [file 13073_2018_593_MOESM5_ESM.xlsx]

## Sheet: Foglio1
Table S4: Most relevant clones represented in the cohort and their abundance. Data regarding ST, SCCmec-, and spa-type for all 184 isolates are reported in Most relevant clones represented in the cohort and their abundance. Data regarding ST, SCCmec-, and spa-type for all 184 isolates are reported in Supplementary Table 1.
ST	SCCmectype	Clone name	# isolates
228	I	South German / Italian	16
22	IV	E-MRSA-15	13
1	IV	USA400	11
5	IV	USA800 / Paediatric	10
8	IV	USA500 / E-MRSA-2/6	4
8	IV	USA300	2
45	IV	Berlin / USA600	2
5	II	USA100 / Japan	1
247	I	Iberian / E-MRSA-5	1
5	I	E-MRSA-3	1
5	II	New York / Japan	1
